# Supplementary figures and images for: Circ-140/chi-miR-8516/STC1-MMP1 Regulates αs1-/β-Casein Secretion and Lipid Formation in Goat Mammary Epithelial Cells
Source: MDPI journal article supplement (doi:10.3390/genes12050671), 2021-04-29

**A**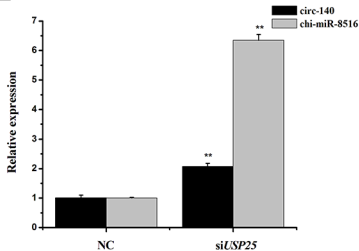**B**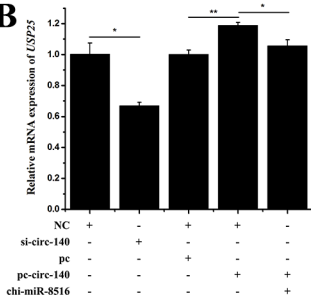**C**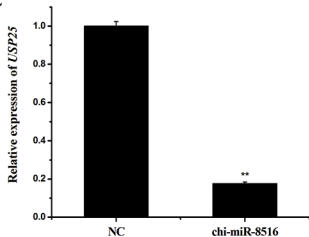**D**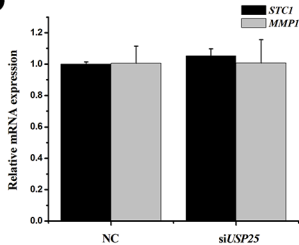

Supplement: s1 [file s1]
